# Supplementary material for: ZFP91 promotes cell proliferation and inhibits cell apoptosis in AML via inhibiting the proteasome-dependent degradation of RIP1
Source: PubMed Central journal article supplement (PMC8795797; doi:10.7150/ijms.67436), 2022-01-01
Supplement: ijmsv19p0274s1.pdf [file ijmsv19p0274s1.pdf]

Table S1: Top 30 interacted partners of ZFP91 identified by HitPredict.

| Interactor Name | Experiments | Category        | Method Score | Annotation Score | Interaction Score | Confidence |
|-----------------|-------------|-----------------|--------------|------------------|-------------------|------------|
| CRBN            | 3           | Small-scale     | 0.71         | 1                | 0.84              | High       |
| M3K14           | 1           | Small-scale     | 0.56         | 1                | 0.747             | High       |
| PRDM5           | 1           | High-throughput | 0.48         | 1                | 0.691             | High       |
| SRPK2           | 1           | High-throughput | 0.42         | 1                | 0.647             | High       |
| ZFP41           | 1           | High-throughput | 0.39         | 1                | 0.621             | High       |
| ZN526           | 1           | High-throughput | 0.39         | 1                | 0.621             | High       |
| FBRL            | 2           | High-throughput | 0.62         | 0.6              | 0.611             | High       |
| FOXA1           | 2           | Small-scale     | 0.57         | 0.6              | 0.584             | High       |
| ESR1            | 2           | High-throughput | 0.54         | 0.6              | 0.571             | High       |
| KAP0            | 2           | High-throughput | 0.54         | 0.6              | 0.571             | High       |
| KI67            | 1           | High-throughput | 0.48         | 0.6              | 0.536             | High       |
| CTR9            | 1           | High-throughput | 0.48         | 0.6              | 0.536             | High       |
| BHA15           | 1           | High-throughput | 0.48         | 0.6              | 0.536             | High       |
| TSYL5           | 1           | High-throughput | 0.48         | 0.6              | 0.536             | High       |
| CHC10           | 1           | High-throughput | 0.48         | 0.6              | 0.536             | High       |
| AKIP            | 1           | High-throughput | 0.48         | 0.55             | 0.513             | High       |
| CLC3A           | 1           | High-throughput | 0.48         | 0.5              | 0.489             | High       |
| TRM7            | 1           | High-throughput | 0.48         | 0.5              | 0.489             | High       |
| PO6F2           | 1           | High-throughput | 0.39         | 0.6              | 0.481             | High       |
| ASPP2           | 1           | High-throughput | 0.39         | 0.6              | 0.481             | High       |
| FAM9A           | 1           | High-throughput | 0.39         | 0.6              | 0.481             | High       |
| TSYL2           | 1           | High-throughput | 0.39         | 0.6              | 0.481             | High       |
| PICK1           | 1           | High-throughput | 0.39         | 0.6              | 0.481             | High       |
| BRD4            | 1           | High-throughput | 0.38         | 0.6              | 0.479             | High       |
| RECQ4           | 1           | High-throughput | 0.38         | 0.6              | 0.479             | High       |
| FOS             | 1           | High-throughput | 0.38         | 0.6              | 0.479             | High       |
| P53             | 1           | High-throughput | 0.38         | 0.6              | 0.479             | High       |
| H2A1B           | 1           | High-throughput | 0.38         | 0.6              | 0.479             | High       |
| APC             | 1           | Small-scale     | 0.38         | 0.6              | 0.479             | High       |
| BRD2            | 1           | High-throughput | 0.38         | 0.6              | 0.479             | High       |

Table S2: Top 30 interacted partners of RIP1 by identified HitPredict.

| Interactor Name | Experiments | Category        | Method Score | Annotation Score | Interaction Score | Confidence |
|-----------------|-------------|-----------------|--------------|------------------|-------------------|------------|
| TNR1A           | 43          | Small-scale     | 0.99         | 1                | 0.994             | High       |
| FADD            | 25          | Small-scale     | 0.98         | 1                | 0.989             | High       |
| RIPK3           | 19          | Small-scale     | 0.98         | 1                | 0.989             | High       |
| BIRC2           | 10          | Small-scale     | 0.96         | 1                | 0.981             | High       |
| RIPK1           | 9           | Small-scale     | 0.95         | 1                | 0.975             | High       |
| TRADD           | 7           | Small-scale     | 0.93         | 1                | 0.964             | High       |
| BIRC3           | 5           | Small-scale     | 0.88         | 1                | 0.938             | High       |
| M3K7            | 4           | Small-scale     | 0.76         | 1                | 0.873             | High       |
| TCAM1           | 4           | Small-scale     | 0.76         | 1                | 0.873             | High       |
| TR10B           | 3           | Small-scale     | 0.68         | 1                | 0.827             | High       |
| XIAP            | 2           | Small-scale     | 0.62         | 1                | 0.785             | High       |
| CRADD           | 2           | Small-scale     | 0.6          | 1                | 0.778             | High       |
| CASP8           | 37          | Small-scale     | 0.99         | 0.6              | 0.77              | High       |
| NEMO            | 25          | Small-scale     | 0.98         | 0.6              | 0.767             | High       |
| TRAF2           | 23          | Small-scale     | 0.98         | 0.6              | 0.767             | High       |
| TNFA            | 24          | Small-scale     | 0.98         | 0.6              | 0.765             | High       |
| PIDD1           | 2           | Small-scale     | 0.57         | 1                | 0.754             | High       |
| TNAP3           | 7           | Small-scale     | 0.93         | 0.6              | 0.746             | High       |
| CSK21           | 2           | High-throughput | 0.54         | 1                | 0.737             | High       |
| CSK23           | 2           | High-throughput | 0.54         | 1                | 0.737             | High       |
| KC1A            | 1           | Small-scale     | 0.54         | 1                | 0.733             | High       |
| TRAF1           | 5           | Small-scale     | 0.87         | 0.6              | 0.722             | High       |
| CFLAR           | 5           | Small-scale     | 0.84         | 0.6              | 0.709             | High       |
| MRCKB           | 1           | High-throughput | 0.49         | 1                | 0.698             | High       |
| OPTN            | 4           | Small-scale     | 0.8          | 0.6              | 0.692             | High       |
| CYLD            | 4           | Small-scale     | 0.76         | 0.6              | 0.676             | High       |
| TAB2            | 4           | Small-scale     | 0.76         | 0.6              | 0.676             | High       |
| LRRK2           | 1           | Small-scale     | 0.44         | 1                | 0.665             | High       |
| ASC             | 1           | High-throughput | 0.44         | 1                | 0.665             | High       |
| TRAF3           | 3           | Small-scale     | 0.73         | 0.6              | 0.664             | High       |
